# Supplementary material for: Kinetics of metal detection by luminescence-based whole-cell biosensors: connecting biosensor response to metal bioavailability, speciation and cell metabolism
Source: Royal Society of Chemistry journal article supplement (doi:10.1039/d3cp04653b), 2023-01-01
Supplement: d3cp04653b1.pdf [file d3cp04653b1.pdf]

## SUPPLEMENTARY INFORMATION

### Kinetics of metal detection by luminescence-based whole-cell biosensors: connecting biosensor response to metal bioavailability, speciation and cell metabolism.

Jérôme F.L. Duval,<sup>1,\*</sup> Lorenzo Maffei,<sup>2</sup> Eva Delatour,<sup>2</sup> Marie Zaffino,<sup>2</sup> Christophe Pagnout<sup>2</sup>

<sup>1</sup> Université de Lorraine, CNRS, LIEC, F-54000 Nancy, France.

<sup>2</sup> Université de Lorraine, CNRS, LIEC, F-57000 Metz, France.

\* Corresponding author (jerome.duval@univ-lorraine.fr).

This document contains 5 supplementary equations and 2 supplementary figures.

#### I. Supplementary equations.

The complete expression of  $f_{a,M}$  involved in Eqs. (17) and (19) that define the time constant  $\tau_o$  and the scalar  $\lambda_o$ , respectively, reads after algebraic arrangements as

$$f_{a,M} = \frac{3\varphi}{1-\varphi} \frac{\bar{h}_a^{-2} \frac{\bar{K}_{ML}}{1+\bar{K}_{ML}} (1-\varepsilon) \left[ \bar{h}_a (\varphi^{-1/3} \operatorname{sech}(\sigma) - 1) + \tanh(\sigma) \right] + \frac{1}{6} (1-\varphi^{-1/3})^2 (1+2\varphi^{1/3}) (\bar{h}_a - \tanh(\sigma))}{\bar{h}_a (1-\varphi^{1/3}) - (1-\varphi^{1/3} + \varepsilon \bar{K}_{ML}) \tanh(\sigma)} \quad (S1)$$

where  $\sigma$  is given by  $\sigma = \bar{h}_a (1-\varphi^{-1/3})$  and  $\bar{h}_a$  is provided by Eq. (4) in the main text. It is verified that Eq. (S1) in the limit  $\varphi \ll 1$  reduces to Eq. (21) written in terms of the ML lability parameter  $\xi$  (Eq. (6)).

Given the expression defining  $c_M^*(t)$  (Eq. (14) in the main text) obtained after arrangements and Laplace transform of Eqs. (9)-(13), the dependence of the intracellular concentration of free M at  $t$ ,  $\phi_M(t)$ , can be evaluated, and the result after algebraic manipulations reads as

$$\phi_M(t) = \frac{K_H k_{\text{int}} \tau_{a,i} c_M^{*,0}}{1 + (p_{ML} Bn)^{-1}} \left[ \frac{e^{-\frac{1+\bar{K}_i}{\bar{K}_i} t}}{\bar{\omega}_- - \bar{\omega}_+} \sum_{n=+,-} \delta_n \left( 1 - \frac{1}{\bar{\omega}_n \bar{K}_i} \right) \left( e^{\left( \frac{1+\bar{K}_i}{\bar{K}_i} - \bar{\omega}_n \right) t} - 1 \right) + \frac{\bar{\tau}_o}{\zeta + \bar{K}_i} \left( 1 - e^{-\frac{1+\bar{K}_i}{\bar{K}_i} t} \right) \right] \quad (S2)$$

where  $\delta_n = 1$  for  $n \equiv +$  and  $\delta_n = -1$  for  $n \equiv -$ , and  $Bn$ ,  $\bar{\tau}_o = \tau_o / \tau_{a,i}$ ,  $\zeta$  and  $\bar{\omega}_{\pm}$  are given by Eqs. (20), (17), (18) and (16), respectively, and  $p_{ML} \approx p_o = 1 + \varepsilon \bar{K}_{ML} \xi$  for  $\varphi \ll 1$  (cf. below Eq. (5)). Combining Eqs. (12) and (S2), the time-dependent concentration of intracellular  $MP_{\text{reg}}$  complex,  $\phi_c(t)$ , can be written in the form

$$\phi_c(t) = \bar{K}_i \frac{K_H k_{\text{int}} \tau_{a,i} c_M^{*,0}}{1 + (p_{ML} Bn)^{-1}} \left[ \frac{\bar{\tau}_o}{\zeta + \bar{K}_i} - \frac{1}{\bar{K}_i} \frac{1}{\bar{\omega}_- - \bar{\omega}_+} \sum_{n=+,-} \delta_n (\bar{\omega}_n)^{-1} e^{-\bar{\omega}_n t} \right] \quad (S3)$$

From Eqs. (S2) and (S3), we infer that the concentrations of intracellular M and  $MP_{\text{reg}}$  complexes at  $t \rightarrow \infty$ , denoted as  $\phi_M^\infty$  and  $\phi_c^\infty$ , respectively, are interrelated by the equilibrium expression

$$\phi_M^\infty = \phi_c^\infty / \bar{K}_i = \frac{K_H k_{\text{int}} \tau_o c_M^{*,0}}{\left[1 + (p_{\text{ML}} B n)^{-1}\right] (\zeta + \bar{K}_i)} \quad (\text{S4})$$

Finally, solution of Eqs. (9)-(13) leads to the following expression of the M surface concentration at equilibrium,  $c_M^a(t \rightarrow \infty) = c_M^{a,\infty}$ ,

$$c_M^{a,\infty} / c_M^{*,0} = \frac{1}{1 + (p_{\text{ML}} B n)^{-1}} \left( c_M^{*,\infty} / c_M^{*,0} + \frac{k_e \tau_o (p_{\text{ML}} B n)^{-1}}{\left[1 + (p_{\text{ML}} B n)^{-1}\right] (\zeta + \bar{K}_i)} \right) \quad (\text{S5})$$

where  $c_M^{*,\infty} / c_M^{*,0}$  is defined by Eq. (22).

## II. Supplementary Figures.

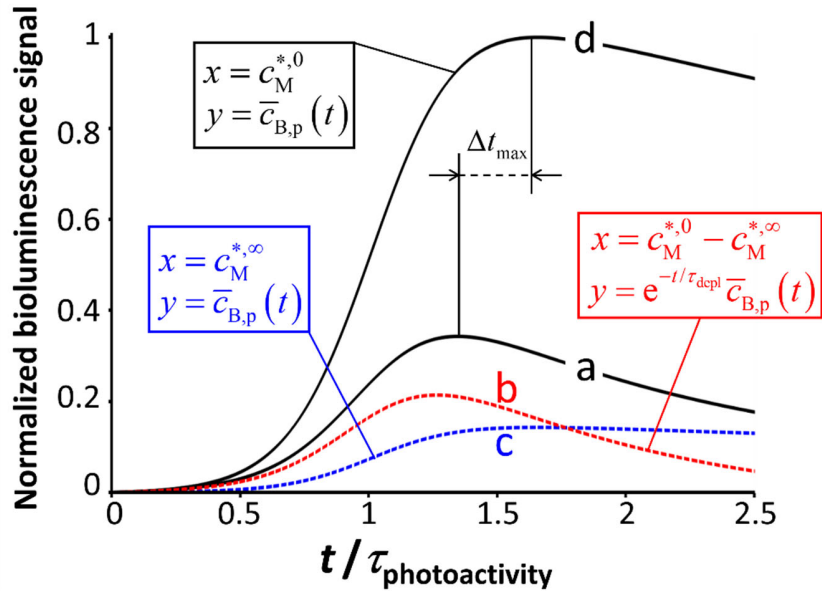

**Figure S1.** Illustration of the decomposition of the bioluminescence signal with account of metal depletion in bulk solution (curve (a)) on the basis of the two terms defined by Eq. (40) in the main text (curves (b) and (c)). Accordingly, the signal corresponding to curve (a) is the sum of the signals pictured by curves (b) and (c). Curve (d) represents the signal obtained without considering the effects of bulk metal depletion. All signals are here normalized by the maximum of bioluminescence reached in the absence of bulk M depletion. The time axis is scaled by  $\tau_{\text{photoactivity}}$  which is the time at which the (dimensionless) concentration of photoactive cells,  $\bar{c}_{B,p}(t)$ , features an inflexion point (cf. main text for details and Figure 5A, red curve therein). The (dummy) variables  $x$  and  $y$  are those defined below Eq. (40), and they specify which bulk M concentration is applicable for computing the signals (b), (c) and (d) (variable  $x$ ) and which expression of the concentration of photoactive cells is relevant to each signal (variable  $y$ ).  $\Delta t_{\text{max}}$  represents the shift in position of the bioluminescence maximum as a result of bulk M depletion. Using the notations detailed in the main text (cf. Eq. (40)), curves (a), (c), (b) and (d) correspond to  $\overline{\text{Lum}}(t) / \overline{\text{Lum}}_{\text{max}} \Big|_{\varphi \ll \varphi^*}$ ,  $\overline{\text{Lum}}^{(0)}(t, c_M^{*,\infty}, \bar{c}_{B,p}(t)) / \overline{\text{Lum}}_{\text{max}} \Big|_{\varphi \ll \varphi^*}$ ,  $\overline{\text{Lum}}^{(0)}(t, c_M^{*,0} - c_M^{*,\infty}, e^{-t/\tau_{\text{depl}}} \bar{c}_{B,p}(t)) / \overline{\text{Lum}}_{\text{max}} \Big|_{\varphi \ll \varphi^*}$  and  $\overline{\text{Lum}}(t) \Big|_{\varphi \ll \varphi^*} / \overline{\text{Lum}}_{\text{max}} \Big|_{\varphi \ll \varphi^*}$ , respectively, where

$\overline{Lum}(t) = Lum(t) / [c_B(1 - \tilde{K}_H S_a c_B)]$  and  $\overline{Lum}^{(0)}(t, x, y) = Lum^{(0)}(t, x, y) / [c_B(1 - \tilde{K}_H S_a c_B)]$ . Figure S1 holds for  $\varphi / \varphi^* = 6$  with the model parameters adopted in Figure 5B of the main text.

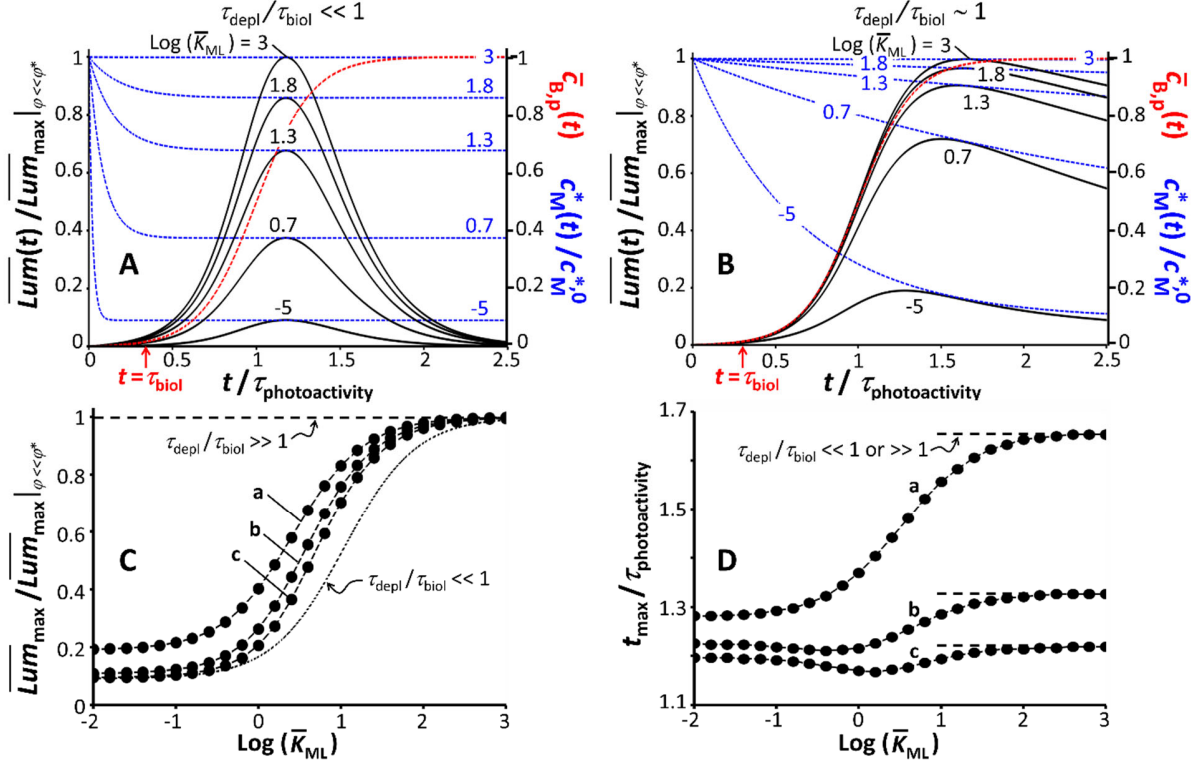

**Figure S2.** Illustrations of the dependence of the dimensionless bioluminescence signal  $\overline{Lum}(t) / \overline{Lum}_{\max} \Big|_{\varphi < \varphi^*}$  (evaluated from Eq. (39)) on time for different dimensionless ML stability constants  $\bar{K}_{ML}$  (indicated) for the situations  $\tau_{\text{depl}} / \tau_{\text{biol}} \ll 1$  (**A**) and  $\tau_{\text{depl}} / \tau_{\text{biol}} \sim 1$  (**B**).  $\tau_{\text{depl}}$  is the timescale for depletion of bulk M concentration and  $\tau_{\text{biol}}$  marks the onset of the increase in the concentration of photoactive cells  $\bar{c}_{B,p}(t)$  with time (red dotted curves). The time axis is scaled by  $\tau_{\text{photoactivity}}$  which is the time at which  $\bar{c}_{B,p}(t)$  features an inflexion point. Blue dotted curves represent the time-dependent (dimensionless) bulk M concentration,  $c_M^*(t) / c_M^{*,0}$ , for each selected value of  $\bar{K}_{ML}$  (Eqs. (14)-(22) or, equivalently, Eq. (25) under the conditions adopted in this figure). The (dimensionless) maxima of the bioluminescence signals and their time-positions  $t_{\max} / \tau_{\text{photoactivity}}$  under the conditions in (**B**) (where  $\tau_{\text{depl}} / \tau_{\text{biol}} \sim 1$ ) are reported in (**C**) and (**D**), respectively. We further provide in (**C**) and (**D**) the signal maxima and associated  $t_{\max} / \tau_{\text{photoactivity}}$ , respectively, as a function of  $\bar{K}_{ML}$  in the extremes  $\tau_{\text{depl}} / \tau_{\text{biol}} \ll 1$  and  $\tau_{\text{depl}} / \tau_{\text{biol}} \gg 1$  for the conditions that hold in (**B**) (indicated). Unless otherwise specified in the figure, adopted model parameters are:  $\varphi / \varphi^* = 10$  with  $\tilde{\varphi} = \varphi^* / (1 + \bar{K}_{ML})$  ( $\tilde{\varphi}$  is independent of  $\bar{K}_{ML}$ ),  $\varepsilon = 1$ ,  $a = 1 \text{ } \mu\text{m}$ ,  $D_M = 10^{-9} \text{ m}^2 \text{ s}^{-1}$ ,  $Bn^{-1} = 0.1$ ,  $\xi \rightarrow 0$ ,  $\bar{K}_i = 10$ ,  $\tau_{a,i} = 0.1 \text{ s}$ ,  $k_r \tau_{a,i} = 10^{-4}$ ,  $k_e = 10^{-3} \text{ s}^{-1}$  (**A**),  $k_e = 10^{-4.5} \text{ s}^{-1}$  (**B,C,D**),  $\tau_{\text{photoactivity}} = 15 \text{ h}$  in (**A**), (**B**), (**C**) (curve (a)) and (**D**) (curve (a)),  $\tau_{\text{photoactivity}} = 30 \text{ h}$  for curves (b) in (**C**) and (**D**),  $\tau_{\text{photoactivity}} = 45 \text{ h}$  for curves (c) in (**C**) and (**D**). The expression adopted for  $F(t)$  in Eq. (39) correspond to Eq. (16) in Ref. [22]. In (**C**) and (**D**), dotted lines connecting symbols are guides to the eye.
